# Supplementary material for: Consumption of sweetened beverages and symptoms of anxiety, depression and stress: an analysis of university students in the PADu-multicenter study
Source: Research Square preprint supplement (doi:10.21203/rs.3.rs-5269417/v1), 2024-10-18
Supplement: Supplementary file 1 [file cc0e8b26d970db5b07f34bfe.docx]

Table 2. Association between consumption of sweetened beverages and symptoms of anxiety, depression and stress in university students.

| **Frequency of consumption** | **Symptoms of anxiety** | | |  | **Symptoms of depression** | | |  | **Symptoms of stress** | | | |
| --- | --- | --- | --- | --- | --- | --- | --- | --- | --- | --- | --- | --- |
| **Rough model** |  | **Adjusted model**ᵃ |  | **Rough model** |  | **Adjusted model**ᵃ |  | **Rough model** |  | **Adjusted model**ᵃ | |
| **OR (95%CI)** |  | **OR (95%CI)** |  | **OR (95%CI)** |  | **OR (95%CI)** |  | **OR (95%CI)** |  | **OR (95%CI)** | |
| Irregular | 1.00 |  | - |  | 1.00 |  | - |  | 1.00 |  | - | |
| Regular | 1.30 (1.15-1.48)*** |  | 1.30 (1.13-1.49)*** |  | 1.36 (1.20-1.55)*** |  | 1.32 (1.14-1.51)*** |  | 1.43 (1.26-1.62)*** |  | 1.41 (1.23-1.61)*** | |
| Increase of 1.5 times/weekᵇ | 1.12 (1.08-1.16)*** |  | 1.12 (1.07-1.16)*** |  | 1.11 (1.07-1.15)*** |  | 1.10 (1.06-1.14)*** |  | 1.12 (1.08-1.16)*** |  | 1.12 (1.08-1.17)*** | |
| Almost never/never | 1.00 |  | - |  | 1.00 |  | - |  | 1.00 |  | - | |
| 1 to 2 days a week | 1.15 (1.03-1.27)** |  | 1.12 (1.01-1.26)* |  | 1.08 (0.98-1.20) |  | 1.11 (0.99-1.24) |  | 1.04 (0.94-1.15) |  | 1.03 (0.92-1.15) | |
| 3 to 4 days a week | 1.34 (1.17-1.53)*** |  | 1.36 (1.18-1.58)*** |  | 1.19 (1.03-1.36)* |  | 1.16 (1.00-1.35)* |  | 1.26 (1.10-1.44)* |  | 1.30 (1.12-1.50)*** | |
| 5 to 6 days a week | 1.30 (1.09-1.55)** |  | 1.32 (1.09-1.60)** |  | 1.29 (1.08-1.54)** |  | 1.27 (1.05-1.54)** |  | 1.46 (1.22-1.74)*** |  | 1.48 (1.22-1.78)*** | |
| Every dayc | 1.58 (1.32-1.90)*** |  | 1.53 (1.25-1.87)*** |  | 1.63 (1.34-1.97)*** |  | 1.55 (1.27-1.90)*** |  | 1.55 (1.29-1.86)*** |  | 1.50 (1.23-1.82)*** | |
| ᵃ The three models were adjusted by the minimum and sufficient set of variables: biological sex, age, race/skin color, family income, housing, population disparity, marital status, frequency of alcohol consumption and tobacco consumption.  b Considered 1.5 times a week, based on the average of the categories.  c Every day, including Saturday and Sunday.  * p ≤ 0.05; ** p ≤ 0.01; *** p ≤ 0.001. | | | | | | | | | | | | |
