# Supplementary material for: Consumption of sweetened beverages and symptoms of anxiety, depression and stress: an analysis of university students in the PADu-multicenter study
Source: Research Square preprint supplement (doi:10.21203/rs.3.rs-5269417/v1), 2024-10-18
Supplement: Supplementary file 2 [file d6b491667fff96721a4cb189.docx]

Table 1. Symptoms of anxiety, depression and stress in relation to sociodemographic variables, lifestyle habits and health conditions.

| **Variables** | | **Total (%)** | **Symptoms of anxiety**  **(%)** | | | **p-value** | | | **Symptoms of depression**  **(%)** | | | | | **p-value** | | | | **Symptoms of stress**  **(%)** | | | **p-value** | | | | | |
| --- | --- | --- | --- | --- | --- | --- | --- | --- | --- | --- | --- | --- | --- | --- | --- | --- | --- | --- | --- | --- | --- | --- | --- | --- | --- | --- |
|  | **No** | | **Yes** | **No** | | | **Yes** | | **No** | | **Yes** |
|  | *Sociodemographic characteristics* | | | | | | |  | |  | |  | | |  | |  | | |  | | |  | |  | |  | |
|  | **Sex** | | | | | | | **<0,001** | |  | | **<0,001** | | | **<0,001** | |  | | |  | | | **<0,001** | |  | |  | |
| Female | | 65.7 | 33.8 | | 66.2 |  | | | 34.6 | | | 65.4 | |  | | | | 36.5 | | 63.5 |  | | | | | |
| Male | | 34.3 | 52.8 | | 47.2 |  | | | 41.8 | | | 58.2 | |  | | | | 54.4 | | 45.6 |  | | | | | |
|  | **Age** | | | | | | | **<0.001** | |  | |  | | | **0.006** | |  | | |  | | | **<0.001** | |  | |  | |
| 18 to 20 years old | | 29.5 | 38.0 | | 62.0 |  | | | 38.3 | | | 61.7 | |  | | | | 40.2 | | 59.8 |  | | | | | |
| 21 to 22 years old | | 24.7 | 40.1 | | 59.9 |  | | | 37.0 | | | 63.0 | |  | | | | 42.6 | | 57.4 |  | | | | | |
| 23 to 25 years old | | 23.1 | 37.9 | | 62.1 |  | | | 33.8 | | | 66.2 | |  | | | | 40.7 | | 59.3 |  | | | | | |
| ≥ 26 years old | | 22.7 | 46.0 | | 54.0 |  | | | 38.6 | | | 61.4 | |  | | | | 47.2 | | 52.8 |  | | | | | |
|  | **Race/skin color** | | | | | | | **0.016** | |  | |  | | | **<0.001** | |  | | |  | | | **0.001** | |  | |  | |
| White | | 55.4 | 41.6 | | 58.4 |  | | | 39.1 | | | 60.9 | |  | | | | 43.8 | | 56.2 |  | | | | | |
| Brown | | 30.9 | 36.8 | | 63.2 |  | | | 29.6 | | | 70.4 | |  | | | | 37.0 | | 63.0 |  | | | | | |
| Black | | 12.3 | 39.9 | | 60.1 |  | | | 36.7 | | | 63.3 | |  | | | | 42.6 | | 57.4 |  | | | | | |
| Other | | 1.4 | 46.2 | | 53.8 |  | | | 37.8 | | | 62.2 | |  | | | | 43.7 | | 56.3 |  | | | | | |
|  | **Sexual orientation** | | | | | | | **<0.001** | |  | |  | | | **<0.001** | |  | | |  | | | **<0.001** | |  | |  | |
| Heterosexual | | 68.2 | 45.7 | | 54.3 |  | | | 42.2 | | | 57.8 | |  | | | | 47.7 | | 52.3 |  | | | | | |
| Homosexual | | 9.0 | 33.7 | | 66.3 |  | | | 28.8 | | | 71.2 | |  | | | | 34.8 | | 65.2 |  | | | | | |
| Bisexual | | 20.1 | 27.7 | | 72.3 |  | | | 26.6 | | | 73.4 | |  | | | | 31.7 | | 68.3 |  | | | | | |
| Asexual | | 1.2 | 24.0 | | 76.0 |  | | | 13.0 | | | 87.0 | |  | | | | 25.0 | | 75.0 |  | | | | | |
| Other | | 1.5 | 22.1 | | 77.9 |  | | | 19.7 | | | 80.3 | |  | | | | 22.1 | | 77.9 |  | | | | | |
| **Religious belief** | |  |  |  | | | 0.055 | |  | |  | | **<0.001** | | |  | | |  | | | **0.014** | |  | |  | |
| No | | 34.7 | 39.4 | | 60.6 |  | | | 30.5 | | | 69.5 | |  | | | | 40.9 | | 59.1 |  | | | | | |
| Yes | | 65.3 | 41.6 | | 58.4 |  | | | 41.1 | | | 58.9 | |  | | | | 43.8 | | 56.2 |  | | | | | |

Table 1. Symptoms of anxiety, depression and stress in relation to sociodemographic variables, lifestyle habits and health conditions (continued).

| **Variables** | | **Total (%)** | **Symptoms of anxiety**  **(%)** | | | **p-value** | | **Symptoms of depression**  **(%)** | | | | **p-value** | | **Symptoms of stress**  **(%)** | | | **p-value** | |
| --- | --- | --- | --- | --- | --- | --- | --- | --- | --- | --- | --- | --- | --- | --- | --- | --- | --- | --- |
|  | **No** | **Yes** | | **No** | | **Yes** | | **No** | | **Yes** |
|  | **Marital status** | | | | **<0.001** | |  | |  | | **<0.001** | |  | |  | | | **<0.001** |
| Single | | 90.6 | 39.4 | 60.6 | |  | | 36.3 | | 63.7 | |  | | 41.7 | | 58.3 |  | |
| Married or in a stable union | | 8.3 | 50.2 | 49.8 | |  | | 45.3 | | 54.7 | |  | | 50.6 | | 49.4 |  | |
| Widowed or divorced | | 1.1 | 42.9 | 57.1 | |  | | 44.9 | | 55.1 | |  | | 52.0 | | 48.0 |  | |
|  | **Family income¹** | | | | **<0.001** | |  | |  | | **<0.001** | |  | |  | | | **<0.001** |
| Up to 2 minimum wages | | 32.1 | 31.3 | 68.7 | |  | | 29.1 | | 70.9 | |  | | 35.5 | | 64.5 |  | |
| 3 to 5 minimum wages | | 40.9 | 41.8 | 58.2 | |  | | 36.8 | | 63.2 | |  | | 42.2 | | 57.8 |  | |
| 6 to 10 minimum wages | | 17.3 | 46.0 | 54.0 | |  | | 43.2 | | 56.8 | |  | | 48.5 | | 51.5 |  | |
| > 10 minimum wages | | 9.7 | 52.8 | 47.2 | |  | | 51.3 | | 48.7 | |  | | 54.6 | | 45.4 |  | |
|  | **Housing** | | | | **0.008** | |  | |  | | 0.432 | |  | |  | | | 0.061 |
| Alone | | 8.2 | 42.2 | 57.8 | |  | | 35.3 | | 64.7 | |  | | 44.2 | | 55.8 |  | |
| With family members | | 76.4 | 40.9 | 59.1 | |  | | 37.4 | | 62.6 | |  | | 42.9 | | 57.1 |  | |
| Shared residence | | 15.4 | 36.6 | 63.4 | |  | | 36.1 | | 63.9 | |  | | 39.7 | | 60.3 |  | |
|  | **Population disparity** | | | | **0.002** | |  | |  | | 0.154 | |  | |  | | | **0.002** |
| It hasn't changed | | 79.9 | 40.5 | 59.5 | |  | | 37.1 | | 62.9 | |  | | 43.1 | | 56.9 |  | |
| Small town to big city | | 13.5 | 36.5 | 63.5 | |  | | 35.2 | | 64.8 | |  | | 38.0 | | 62.0 |  | |
| Big city to small town | | 6.6 | 45.0 | 55.0 | |  | | 39.9 | | 60.1 | |  | | 45.6 | | 54.4 |  | |
|  | |  |  |  | |  | |  | |  | |  | |  | |  |  | |

Table 1. Symptoms of anxiety, depression and stress in relation to sociodemographic variables, lifestyle habits and health conditions (continued).

| **Variables** | **Total (%)** | **Symptoms of anxiety**  **(%)** | | **p-value** | **Symptoms of depression**  **(%)** | | **p-value** | **Symptoms of stress**  **(%)** | | **p-value** |
| --- | --- | --- | --- | --- | --- | --- | --- | --- | --- | --- |
|  | **No** | **Yes** | **No** | **Yes** | **No** | **Yes** |

| *Lifestyle habits* | |  |  |  | |  | |  |  | |  | |  |  | |  | |  | |  | |  | |  |
| --- | --- | --- | --- | --- | --- | --- | --- | --- | --- | --- | --- | --- | --- | --- | --- | --- | --- | --- | --- | --- | --- | --- | --- | --- |
|  | **Alcohol consumption** | | | | |  | | 0.827 |  | | 0.938 | |  |  | |  | | 0.758 | |  | |  | |  |
| No | | 43.8 | 40.0 | | 60.0 | |  | | 36.9 | 63.1 |  | 42.2 | | | 57.8 | |  | | |  | |  | |
| 1 to 2 times a week | | 25.2 | 40.3 | | 59.7 | |  | | 36.8 | 63.2 |  | 42.5 | | | 57.5 | |  | | |  | |  | |
| 3 to every day of the week | | 31.0 | 40.8 | | 59.2 | |  | | 37.3 | 62.7 |  | 43.1 | | | 56.9 | |  | | |  | |  | |
| **Tobacco consumption** | |  |  |  | |  | | **<0.001** |  | | **<0.001** | |  |  | |  | | **<0.001** | |  | |  | |  |
| No | | 84.3 | 42.1 | | 57.9 | |  | | 39.0 | 61.0 |  | 44.1 | | | 55.9 | |  | | |  | |  | |
| Yes | | 15.7 | 30.6 | | 69.4 | |  | | 26.4 | 73.6 |  | 34.2 | | | 65.8 | |  | | |  | |  | |
| **Fruit consumption** | |  |  |  | |  | | **<0.001** |  | | **<0.001** | |  |  | |  | | **<0.001** | |  | |  | |  |
| Regular | | 36.7 | 45.1 | | 54.9 | |  | | 44.0 | 56.0 |  | 45.6 | | | 54.4 | |  | | |  | |  | |
| Irregular | | 63.3 | 37.5 | | 62.5 | |  | | 33.0 | 67.0 |  | 40.8 | | | 59.2 | |  | | |  | |  | |
| **Physical activity** | |  |  |  | |  | | **<0.001** |  | | **<0.001** | |  |  | |  | | **<0.001** | |  | |  | |  |
| No | | 36.0 | 33.8 | | 66.2 | |  | | 28.9 | 71.1 |  | 36.9 | | | 63.1 | |  | | |  | |  | |
| Yes | | 64.0 | 43.9 | | 56.1 | |  | | 41.6 | 58.4 |  | 45.7 | | | 54.3 | |  | | |  | |  | |
| *Health conditions* | |  |  |  | |  | |  |  | |  | |  |  | |  | |  | |  | |  | |
| **BMI** | |  |  |  | |  | | **<0.001** |  | | **<0.001** | |  |  | |  | | **<0.001** | |  | |  | |
| Not overweight | | 65.2 | 41.8 | | 58.2 | |  | | 39.1 | 60.9 |  | 44.5 | | | 55.5 | |  | | |  | |  | |
| Overweight | | 34.8 | 37.8 | | 62.2 | |  | | 33.2 | 66.8 |  | 38.8 | | | 61.2 | |  | | |  | |  | |
|  | **Psychotropic drugs** | | | | |  | | **<0.001** |  | | **<0.001** | |  |  | |  | | **<0.001** | |  | |  | |
| No | | 74.4 | 45.8 | | 54.2 | |  | | 41.9 | 58.1 |  | 47.4 | | | 52.6 | |  | | |  | |  | |
| Yes | | 25.6 | 24.3 | | 75.7 | |  | | 22.7 | 77.3 |  | 28.5 | | | 71.5 | |  | | |  | |  | |
|  | |  |  | |  | |  | |  |  |  |  | | |  | |  | | |  | |  | |
| **Medical diagnosis of anxiety** | |  |  | |  | | **<0.001** | |  |  | **<0.001** |  | | |  | | **<0.001** | | |  | |  | |
| No | | 43.3 | 58.1 | | 41.9 | |  | | 49.0 | 51.0 |  | 58.4 | | | 41.6 | |  | | |  | |  | |
| Yes | | 56.7 | 26.7 | | 73.3 | |  | | 27.9 | 72.1 |  | 30.4 | | | 69.6 | |  | | |  | |  | |
| **Medical diagnosis of depression** | |  |  | |  | | **<0.001** | |  |  | **<0.001** |  | | |  | | **<0.001** | |  | |  | |
| No | | 68.9 | 48.1 | | 51.9 | |  | | 46.3 | 53.7 |  | 50.1 | | | 49.9 | |  | |  | |  | |
| Yes | | 31.1 | 23.0 | | 77.0 | |  | | 16.5 | 83.5 |  | 25.9 | | | 74.1 | |  | |  | |  | |

¹Minimum wage for the year 2021 in Brazil, equivalent to R$1,100.00.

BMI: body mass index.

P-value obtained by Pearson's chi-squared test.

Values in bold indicate statistical significance (p-value <0.05).
